# Supplementary material for: Sediment source and sink identification using Sentinel-2 and a small network of turbidimeters on the Vjosa River
Source: Copernicus journal article supplement (doi:10.5194/esurf-11-881-2023), 2023-09-19
Supplement: Supplementary file 1 [file esurf-11-881-2023-supplement.pdf]

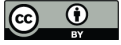

*Supplement of*

## **Sediment source and sink identification using Sentinel-2 and a small network of turbidimeters on the Vjosa River**

**Jessica Droujko et al.**

*Correspondence to:* Jessica Droujko ([droujko@ifu.baug.ethz.ch](mailto:droujko@ifu.baug.ethz.ch))

The copyright of individual parts of the supplement might differ from the article licence.

| ROI (station number, name) | R_R1 (coastal aerosol) | R_R2 (Blue) | R_R3 (Green) | R_R4 (Red) | R_R5 (Vegetation red edge) | R_R6 (Vegetation red edge) | R_R7 (Vegetation red edge) | R_R8 (NIR) | R_R8A (Vegetation red edge) | R_R11 (SWIR) | R_R12 (SWIR) |
|----------------------------|------------------------|-------------|--------------|------------|----------------------------|----------------------------|----------------------------|------------|-----------------------------|--------------|--------------|
| 5, Pocem                   | 0.83                   | 0.82        | 0.82         | 0.8        | 0.78                       | 0.69                       | 0.69                       | 0.66       | 0.62                        | -0.14        | -0.19        |
| 24, Dragot                 | 0.05                   | 0.27        | 0.23         | 0.3        | 0.22                       | 0.04                       | 0.01                       | -0.03      | -0.11                       | -0.38        | -0.37        |
| 31, Lower Aaos             | 0.51                   | 0.53        | 0.49         | 0.54       | 0.5                        | 0.41                       | 0.39                       | 0.4        | 0.37                        | 0.06         | -0.01        |
| 43, Konitsa                | 0.28                   | 0.45        | 0.46         | 0.49       | 0.43                       | 0.33                       | 0.32                       | 0.32       | 0.27                        | 0.21         | 0.21         |
| All                        | 0.33                   | 0.48        | 0.46         | 0.45       | 0.37                       | 0.20                       | 0.18                       | 0.18       | 0.11                        | -0.07        | -0.09        |

**Supplementary Table S1** - Correlation values between  $\log(\text{Turbidity})$  and the different bands of Sentinel-2 for the four stations (ROIs) and for all of the data points together. The correlation values in orange are those that are  $> 0.4$ .

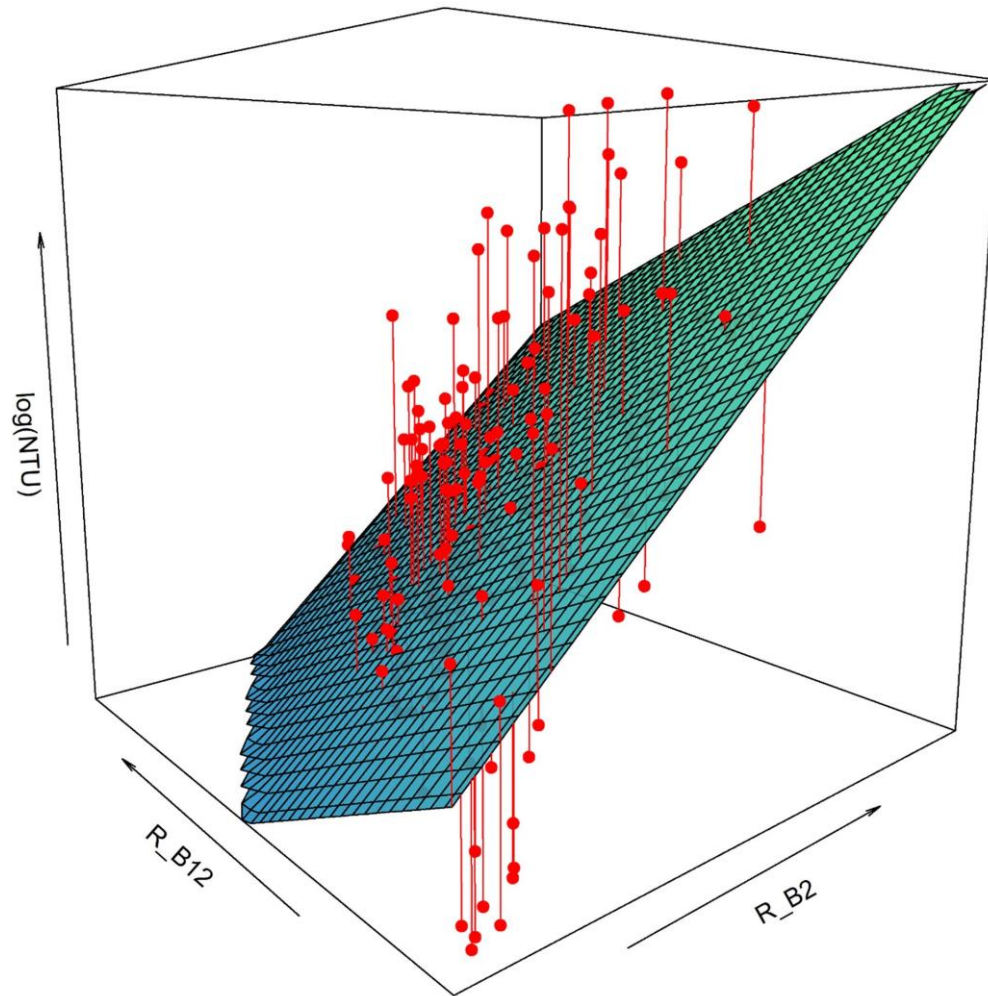

**Supplementary Figure S2** – 3D regression plot of  $\log(\text{Turbidity})$  vs. reflectance bands for equation (1)
